# Supplementary material for: Generating conditional gene knockouts in Plasmodium – a toolkit to produce stable DiCre recombinase-expressing parasite lines using CRISPR/Cas9
Source: Springer Nature journal article supplement (doi:10.1038/s41598-017-03984-3), 2017-06-14

# **Generating conditional gene knockouts in *Plasmodium* – a toolkit to produce stable DiCre recombinase- expressing parasite lines using CRISPR/Cas9**

**Ellen Knuepfer<sup>1\*</sup>, Marta Napiorkowska<sup>2†</sup>, Christiaan van Ooij<sup>2\*</sup>,  
Anthony A. Holder<sup>1\*</sup>**

Malaria Parasitology<sup>1</sup> and Malaria Biochemistry<sup>2</sup> Laboratories, The Francis  
Crick Institute, 1 Midland Road, London, NW1 1AT, United Kingdom

† Current address: Department of Biosystems Science and Engineering, ETH  
Zurich, Mattenstrasse 26, Basel 4058, Switzerland

## **Supplementary Table 1. Polymorphism in *Pfs47* gene**

DNA sequences from *P. falciparum* lab strains and 19 field isolates from French Guiana (obtained from PlasmoDB.org) from diverse geographical regions were analysed for SNPs within the *pfs47* ORF and the 5'UTR region. Nucleotide positions are listed on the top of the table based on ORF numbering in the 3D7 reference sequence; HR2 is the second homology region. Dots indicate identical nucleotides based on the 3D7 reference sequence. The SNPs at positions 532, 581, 707, 725, 740 and 742 are at fixation or near fixation frequencies in lines from South America.

## **Supplementary Table 2. Polymorphism in *p230p* gene**

DNA sequences from *P. falciparum* lab strains and 19 field isolates from French Guiana (obtained from PlasmoDB.org) from diverse geographical regions were analysed for SNPs within the *p230p* ORF region 4979 – 6744 bp. Nucleotide positions are listed on the top of the table based on ORF numbering in the 3D7 reference sequence; HR2 is the second homology region. Dots indicate identical nucleotides based on the 3D7 reference sequence.

### **Supplementary Table 3. Primer list**

List of the oligonucleotides used in this study and their DNA sequences. Restriction enzyme recognition sites are underlined. Four base pair additions to create sticky ends and allow ligation of guide RNA pairs into pDC-Cas9-hDHRFyFCU vector are shown in bold. The *loxP* sequence is shown in italics.

### **Supplementary Figure S1. Plasmid map of pDC2-Cas9-hDHRyFCU**

This vector is derived from pDC2-Cas9-U6-*hdhfr*<sup>1</sup> (GenBank accession number KY574493) and encodes the Cas9 nuclease as well as the single guide RNA. Cas9 is driven by the calmodulin promoter; the positive (*hdhfr*) and negative (*yfcu*) selection cassette are fused and driven by a single, constitutively active promoter (*PcDT*, *P. chabaudi* dihydrofolate reductase-thymidylate synthase). A 549 bp *U6* promoter drives the transcription of the protospacer-tracrRNA fusion (sgRNA) and is followed by a 52 bp *U6* terminator. Protospacers were cloned into the guideRNA cassette using BbsI sites.

**Supplementary Figure S2. Maps for rescue plasmids pBSp230pDiCre and pBSPfs47DiCre.**

Regions of DNA sequence homology to *p230p* and *pfs47* are indicated in yellow. The DiCre expression cassette is unaltered from pBS\_DC\_hsp86/BiP5'<sup>2</sup> with the Cre60 domain driven by the *hsp86* promoter and the Cre59 domain by the *bip* promoter. Nuclear localisation sequences are indicated in dark blue.

**Supplementary Figure S3. Plasmid map of pDC2-Cas9-PACyFCU**

This CRISPR/Cas9 vector encodes the Cas9 nuclease and the single guide RNA cassette. This vector is a derivative from pDC2-Cas9-U6-*hdhfr* and contains the positive drug selection cassette puromycin N-acetyltransferase (*pac*) and the negative selection (*yfcu*)

**Supplementary Figure S4. Plasmid map for reporter plasmid, pHH3-SP-loxPint-GFP-loxP**

The open reading frame of *gfp* is indicated in green and flanked by two *loxP* sites (yellow), of which the upstream site is located within the *SERA2* intron (*loxPint*). The brown box represents 110 bp of the *mSP3* ORF encoding the predicted signal peptide sequence and cleavage site. The reporter cassette is driven by 1258 bp of the *mSP3* promoter for transcription during schizogony.

**Supplementary Figure S5. DiCre recombinase disrupted *p230p* and *pfs47* loci show no reversion to wild type**

PCR amplification of the transgene-disrupted loci *p230p*, *pfs47* and *SERA5*. Genomic DNA was isolated from rapamycin-treated reporter lines 3D7,

1G5DC, Pfs47-13 and II-3 transfected with pHH3-SP-loxPint-GFP-loxP maintained on 2.5 µg/ml blasticidin which have been in continuous culture for 3 months. To detect the restored endogenous locus as a result of reversion and loss of the DiCre cassette in a subset of the parasite population, PCR was performed with the following primer pairs: 9/10 amplifying a 1114 bp region of *pfs47* ORF, 1/2 amplifying a 772 bp region of *p230p* ORF and SERA5reversion for/rev amplifying a 1119 bp region of *sera5*. DNA size markers are indicated on the left.

#### **References:**

1. Lim, M. Y.-X. *et al.* UDP-galactose and acetyl-CoA transporters as *Plasmodium* multidrug resistance genes. *Nature Microbiology* **1**, 16166 (2016).
2. Collins, C. R. *et al.* Robust inducible Cre recombinase activity in the human malaria parasite *Plasmodium falciparum* enables efficient gene deletion within a single asexual erythrocytic growth cycle. *Mol Microbiol* **88**, 687–701 (2013).

**Supplementary Table S1:**

|               |                                   |                  | HR2 |     |     |     |     |     |     |     |     |     |     |     |     |
|---------------|-----------------------------------|------------------|-----|-----|-----|-----|-----|-----|-----|-----|-----|-----|-----|-----|-----|
|               |                                   |                  | 82  | 163 | 203 | 532 | 581 | 657 | 671 | 707 | 718 | 725 | 740 | 742 | 814 |
| Africa        | Laboratory lines                  | 3D7              | C   | G   | C   | A   | C   | G   | T   | C   | C   | C   | T   | A   | A   |
|               |                                   | GB4              | .   | .   | .   | .   | A   | .   | .   | .   | .   | .   | .   | .   | .   |
| Latin America | Field Isolates from French Guiana | G224             | .   | .   | T   | G   | A   | .   | .   | T   | .   | T   | C   | T   | .   |
|               |                                   | H209             | .   | .   | .   | .   | A   | .   | .   | T   | .   | T   | C   | T   | .   |
|               |                                   | N011-A           | .   | .   | .   | .   | A   | .   | .   | T   | .   | T   | C   | T   | .   |
|               |                                   | N023-A           | .   | .   | T   | G   | A   | .   | .   | T   | .   | T   | C   | T   | .   |
|               |                                   | N071-I           | .   | .   | .   | .   | A   | .   | .   | T   | .   | T   | C   | T   | .   |
|               |                                   | N164-A           | .   | .   | .   | .   | A   | .   | .   | T   | .   | T   | C   | T   | .   |
|               |                                   | N497-C           | .   | .   | .   | .   | A   | .   | .   | T   | .   | T   | C   | T   | .   |
|               |                                   | N579-A           | .   | .   | .   | .   | A   | .   | .   | T   | .   | T   | C   | T   | .   |
|               |                                   | O079-B           | .   | .   | .   | .   | A   | .   | .   | T   | .   | T   | C   | T   | .   |
|               |                                   | O141-A           | .   | .   | .   | .   | A   | .   | .   | T   | .   | T   | C   | T   | .   |
|               |                                   | O222-A           | .   | .   | T   | G   | A   | .   | .   | T   | .   | T   | C   | T   | .   |
|               |                                   | O306-A           | .   | .   | .   | .   | A   | .   | .   | T   | .   | T   | C   | T   | .   |
|               |                                   | O314             | .   | .   | .   | .   | A   | .   | .   | T   | .   | T   | C   | T   | .   |
|               |                                   | P164-C           | .   | .   | .   | .   | A   | .   | .   | T   | .   | T   | C   | T   | .   |
|               |                                   | P167-B           | .   | .   | T   | G   | A   | .   | .   | T   | .   | T   | C   | T   | .   |
|               |                                   | P237-C           | .   | .   | .   | .   | A   | .   | .   | T   | .   | T   | C   | T   | .   |
|               |                                   | P241-D           | .   | .   | T   | G   | A   | .   | .   | T   | .   | T   | C   | T   | .   |
|               |                                   | PS103            | .   | .   | .   | .   | A   | .   | .   | .   | .   | .   | .   | T   | T   |
|               | PS122_G1                          | .                | .   | .   | .   | A   | A   | .   | .   | .   | .   | .   | .   | .   |     |
|               | South-East Asia                   | Laboratory lines | 7G8 | .   | .   | .   | .   | A   | .   | .   | T   | .   | T   | C   | T   |
| CS2           |                                   |                  | A   | A   | .   | .   | A   | .   | A   | T   | A   | .   | .   | T   | T   |
| SantaLucia    |                                   |                  | .   | .   | .   | G   | A   | .   | .   | T   | .   | T   | C   | T   | .   |
| HB3           |                                   |                  | .   | .   | .   | G   | A   | .   | .   | T   | .   | T   | C   | T   | .   |
| Dd2           |                                   |                  | A   | A   | .   | .   | A   | .   | A   | T   | A   | .   | .   | T   | T   |
| T9_94         | A                                 | A                | .   | .   | A   | .   | .   | T   | A   | .   | .   | T   | T   |     |     |

**Supplementary Table S2:**

|               |                                   |                 | HR2              |      |      |      |   |
|---------------|-----------------------------------|-----------------|------------------|------|------|------|---|
|               |                                   |                 | 5944             | 6264 | 6432 | 6531 |   |
| Africa        | Laboratory lines                  | 3D7             | G                | G    | T    | G    |   |
|               |                                   | GB4             | A                | .    | .    | T    |   |
| Latin America | Field Isolates from French Guiana | G224            | .                | A    | .    | .    |   |
|               |                                   | H209            | .                | A    | .    | .    |   |
|               |                                   | N011-A          | .                | A    | .    | .    |   |
|               |                                   | N023-A          | .                | A    | .    | .    |   |
|               |                                   | N071-I          | .                | A    | .    | .    |   |
|               |                                   | N164-A          | .                | A    | .    | .    |   |
|               |                                   | N497-C          | .                | A    | .    | .    |   |
|               |                                   | N579-A          | .                | A    | .    | .    |   |
|               |                                   | O079-B          | .                | A    | .    | .    |   |
|               |                                   | O141-A          | A                | .    | C    | .    |   |
|               |                                   | O222-A          | .                | A    | .    | .    |   |
|               |                                   | O306-A          | .                | A    | .    | .    |   |
|               |                                   | O314            | .                | A    | .    | .    |   |
|               |                                   | P164-C          | .                | A    | .    | .    |   |
|               |                                   | P167-B          | A                | .    | C    | .    |   |
|               |                                   | P237-C          | .                | A    | .    | .    |   |
|               |                                   | P241-D          | .                | A    | .    | .    |   |
|               |                                   | PS103           | .                | .    | C    | .    |   |
|               |                                   | PS122_G11       | A                | .    | .    | .    |   |
|               |                                   | South-East Asia | Laboratory lines | 7G8  | A    | .    | . |
|               | CS2                               |                 |                  | A    | .    | .    | . |
|               | SantaLucia                        |                 |                  | A    | .    | .    | . |
|               | HB3                               |                 |                  | A    | .    | .    | . |
| Dd2           | A                                 |                 |                  | .    | .    | .    |   |
|               |                                   | T9_94           | A                | .    | .    | .    |   |

### Supplementary Table S3:

| oligo name         | alternative name    | DNA sequence 5' - 3'                                                                       | restriction enzyme sites (underlined) |
|--------------------|---------------------|--------------------------------------------------------------------------------------------|---------------------------------------|
| p1                 | FL5extfor           | CCATATCTTTTGATACTTCGGTAAATGTAC                                                             |                                       |
| p2                 | FL5middle rev       | ATGGTTTATCATATGTACATCATGACCTTG                                                             |                                       |
| p3                 | FL6middle for       | ATGTGCTAGGCATATCTACAATGTCTC                                                                |                                       |
| p4                 | FL6ext rev          | TTGCTCATATTCTGATGTGGTAGTATCTG                                                              |                                       |
| p5                 | Cam3'utrseq2        | CCATTTACACATAAATGTCACACAAAAGAG                                                             |                                       |
| p6                 | Hsp865'utr seq1     | GAAATAATTTTCATATACACATATAC                                                                 |                                       |
| p7                 | Pfs47extfor         | ATTGCATACACATAAATATTTGTGTTGTAC                                                             |                                       |
| p8                 | Pfs47intrev         | CACATACGTATTGTGTTGAGCTTAATAG                                                               |                                       |
| p9                 | Pfs47intFor         | CTAATGTTAAGCCAACCTGTAGTTGGG                                                                |                                       |
| p10                | Pfs47extrev         | GATGCGATATGTAATTCCATTACTGC                                                                 |                                       |
| p11                | MSP3promseq2        | ATTTGCACACATTATTACGTCTAAATC                                                                |                                       |
| p12                | Hrp2seq3            | GATTCATTATTCTATATTTATAAGGAAGATTAC                                                          |                                       |
| p13                | CVO001              | GGAC <u>CTCGAG</u> ATGAGTTTTAAAAAGAAGAAAATTTATTTTGTGTC                                     | XhoI                                  |
| p14                | CVO097              | CATTTAAACCTTTCCAATATCACACATTTGC                                                            |                                       |
| 115for             | P230pguide115Leefor | <b>ATTG</b> TCGAAATTGAACTTATTGA                                                            |                                       |
| 115rev             | P230pguide115Leerev | <b>AAACT</b> CAATAAGTTCAATTTCGA                                                            |                                       |
| 120for             | P230pguide120Leefor | <b>ATTG</b> AAAATGATATTGTCGGATT                                                            |                                       |
| 120rev             | P230pguide120Leerev | <b>AAAC</b> AATCCGACAATATCATTTT                                                            |                                       |
| 287for             | pDC287for           | <b>ATTG</b> ATGTTAAGCCAACCTGAGT                                                            |                                       |
| 287rev             | pDC287rev           | <b>AAAC</b> ACTACAGTTGGCTTAACAT                                                            |                                       |
| DHFRyFCUfor        |                     | CCTTAA <u>CCATGG</u> TTGGTTCGCTAAACTGCATCG                                                 | NcoI                                  |
| DHFRyFCUrev        |                     | TTACTT <u>CCGCGG</u> TTAAACACAGTAGTATCTGTCCACC                                             | SacII                                 |
| Y1for              |                     | GATTATGGGTAAAGAAAACCTGGTTCTCCATTCTGAG                                                      |                                       |
| Y1rev              |                     | CTCAGGAATGGAGAACCAGGTTTTCTTACCCATAATC                                                      |                                       |
| Y2for              |                     | CCAGAGGATATATCTGAAAGGTATGTATTCCTATTAGACCCA                                                 |                                       |
| Y2rev              |                     | TGGGTCTAATAGGAATACATACCTTTAGATATATCCTCTGG                                                  |                                       |
| MSP3SPfor          |                     | AACCTAGCTAGCATGAAAAGTTTTATAAATATACTTTTCATTATTTTTG                                          | NheI                                  |
| GFPloxPrev         |                     | AATATTCCGCGGATAA <u>CTTCGTATAA</u> TGTATGCTATACGAAGTTATTTATTTGTATAGTTCATCCATGCCATGTGAATCCC | SacII                                 |
| P230pF5for         |                     | AATAAGAGCTCATGAATATAAAAGAAAAGAACTTCGGATAAAATCAAACG                                         | SacI                                  |
| P230pF5rev         |                     | AATA <u>ACTTAA</u> GTAAAGCTTGAAGCTGACGATAATGTTGATGG                                        | AflII                                 |
| P230pF6for         |                     | AATGG <u>ACTAGT</u> ACAAAAAGTATCAAGAAAAAAAATCACAAGGAGG                                     | SpeI                                  |
| P230pF6rev         |                     | AATAAGGT <u>ACC</u> GTGTACAGAAGAACGACTAGATGATATATTATCTCC                                   | KpnI                                  |
| CVO115             |                     | GGACGAGCTCCGTTAAGTACATATTTGTATATGCACACATAAATTTTTCC                                         | SacI                                  |
| CVO116             |                     | GGACGAGCTCGCTGATCATTCTTCCCATACAC                                                           | SacI                                  |
| CVO117             |                     | GGAC <u>ACTAGT</u> GACTATAAACAACCCTACGTTGGGTGACC                                           | SpeI                                  |
| CVO118             |                     | GGACGGT <u>ACC</u> GGTAAGGCTAACATATACATGCCTTCC                                             | KpnI                                  |
| SERA5reversion for |                     | CAAATGGTACAACCTGGTGAACAAGG                                                                 |                                       |
| SERA5reversion rev |                     | CTAAGGTACCTGTTGTATCTACGTC                                                                  |                                       |
| PACfor NcoI        |                     | CCTTAA <u>CCATGG</u> ATGACTGAATACAAACCAACTGTTC                                             | NcoI                                  |
| PACrev(int)        |                     | TCCACCAGATCCACCTCCTCCGCTAGCAGCACCTGGTTTGCAGTCATGC                                          |                                       |
| LinkerintFor       |                     | GCTAGCGGAGGAGGTGGATCTGGTGGAGGTGG                                                           |                                       |

Supplementary Figure S1:

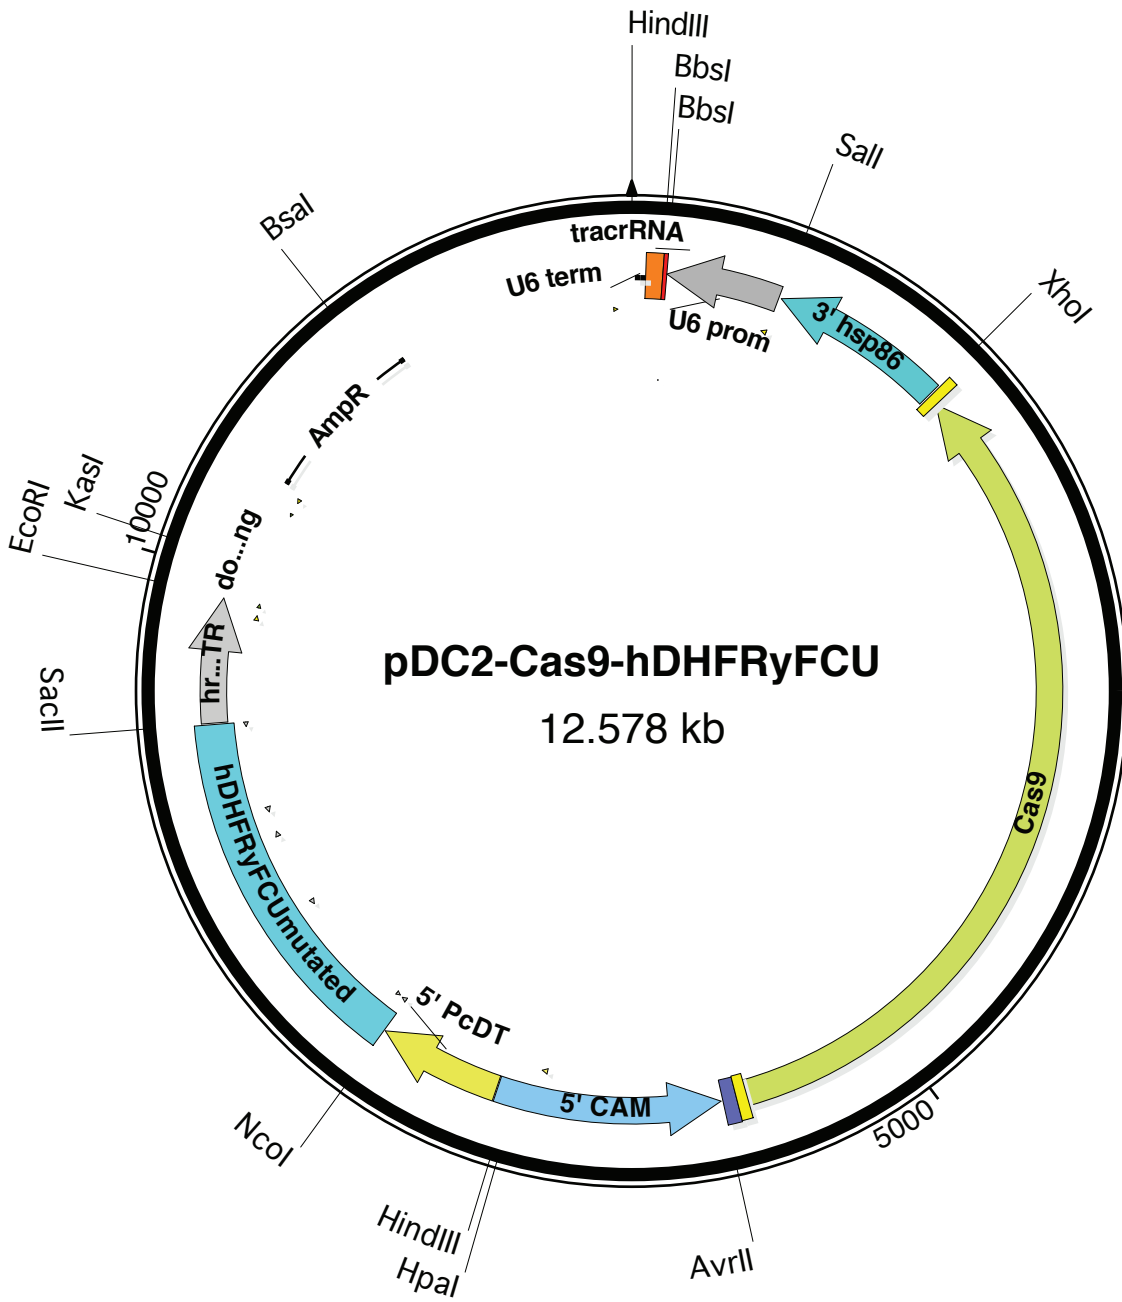



## Supplementary Figure S2:

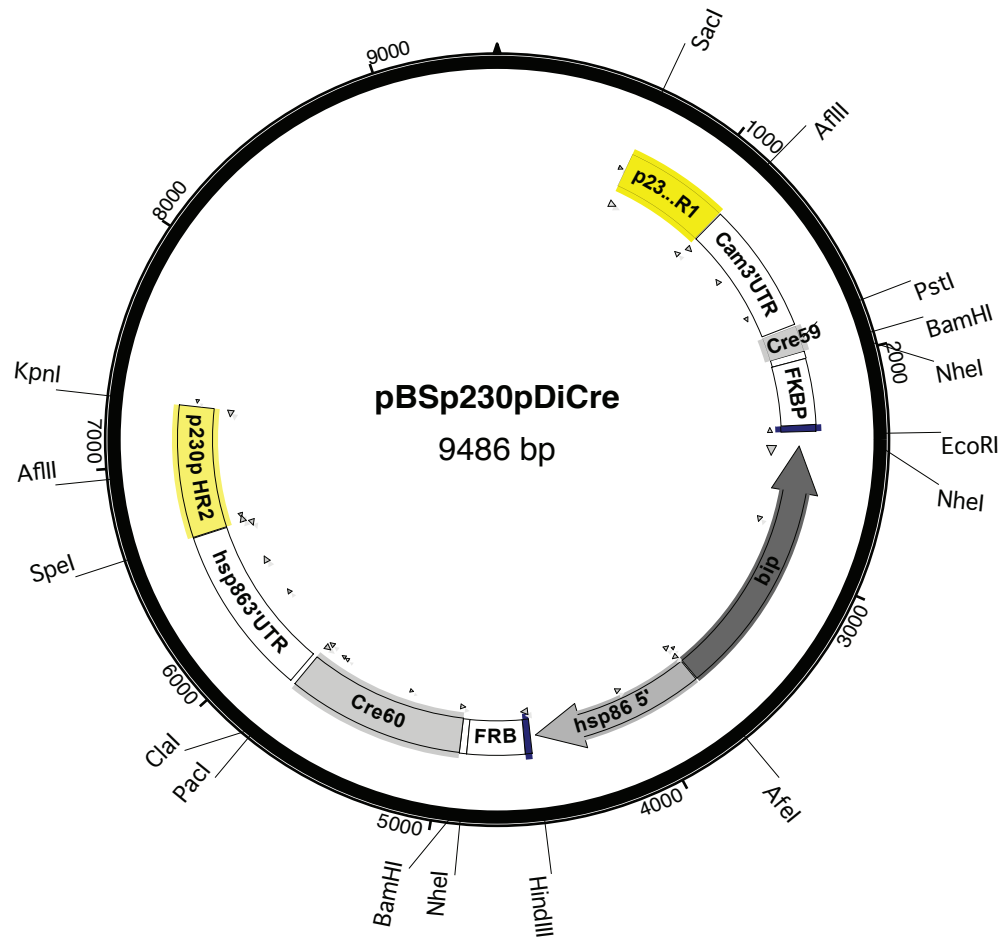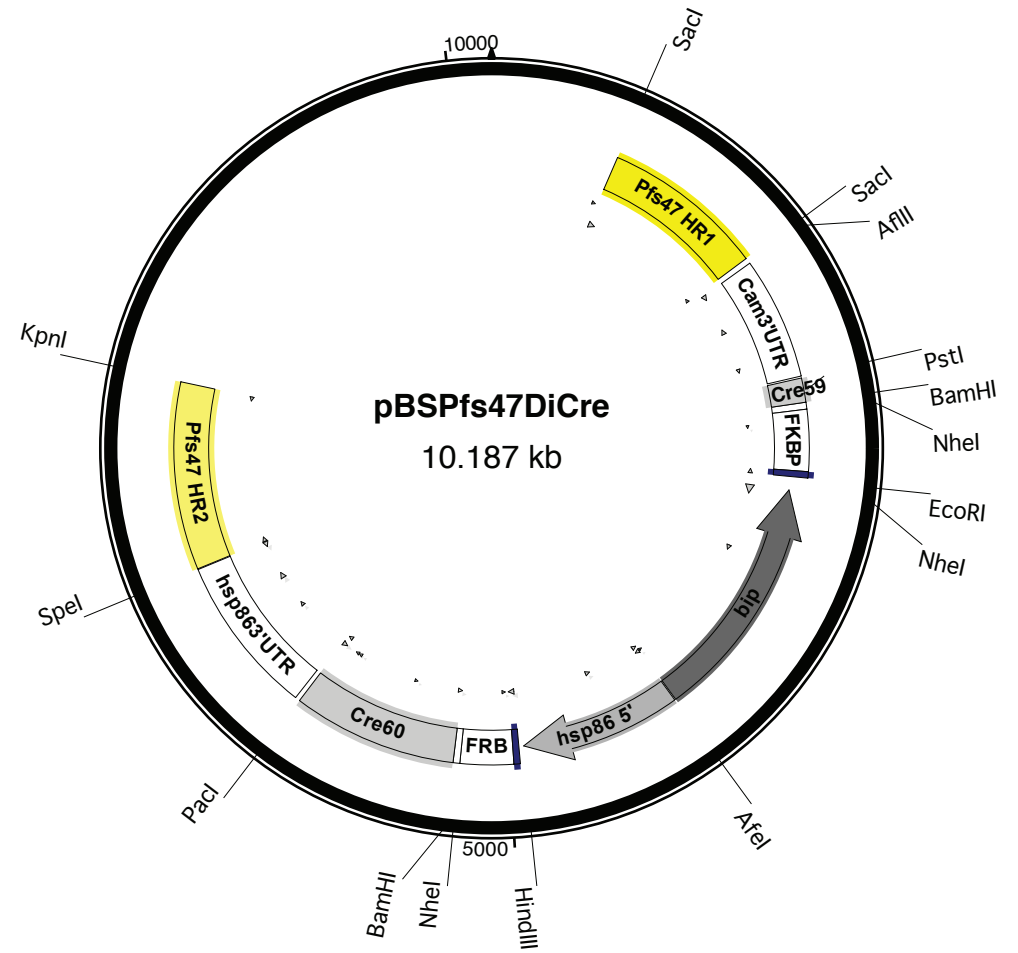

Supplementary Figure S3:

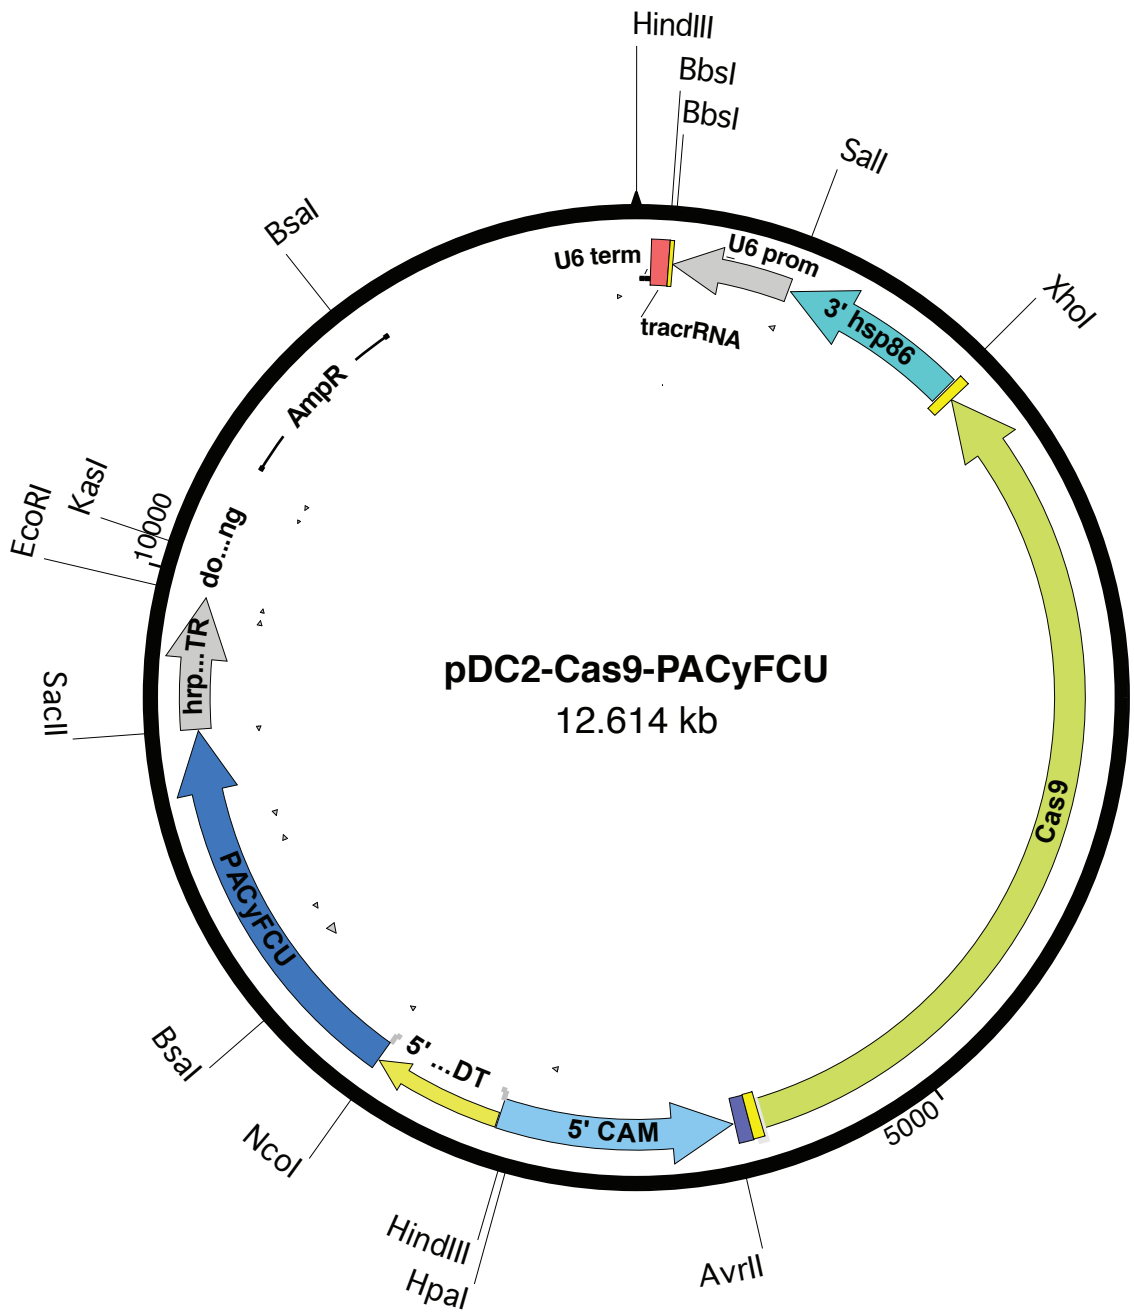

Supplementary Figure S4:

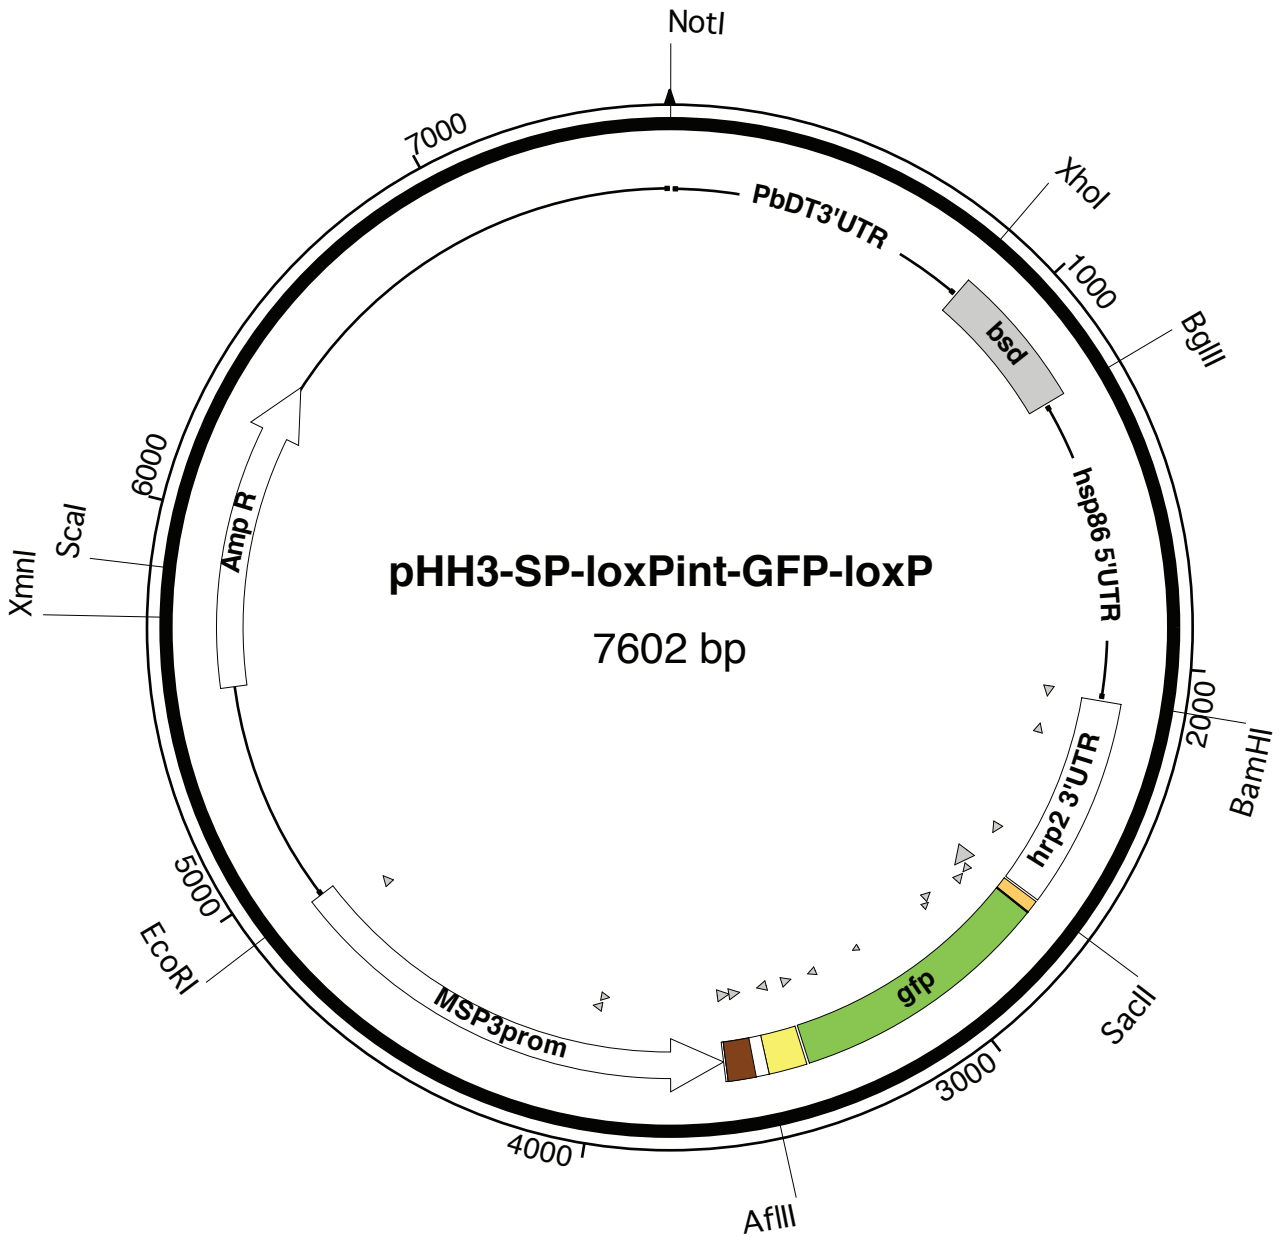

## Supplementary Fig S5:

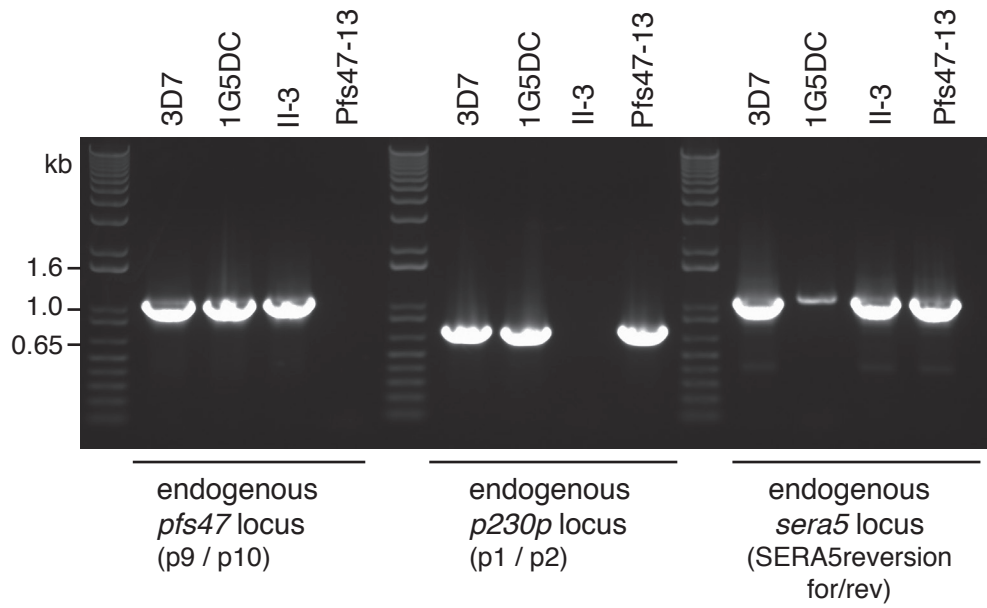

Supplement: 41598_2017_3984_MOESM1_ESM.pdf [file 41598_2017_3984_MOESM1_ESM.pdf]
